# Supplementary material for: The risk of intrapartum/neonatal mortality and morbidity following birth at 37 weeks of gestation: a nationwide cohort study
Source: PubMed Central journal article supplement — BJOG. 2019 Apr 24;126(10):1252–7. doi: 10.1111/1471-0528.15748 (PMC6767499; doi:10.1111/1471-0528.15748), 2019-04-24
Supplement: BJO-126-1252-s001.pdf [file BJO-126-1252-s001.pdf]

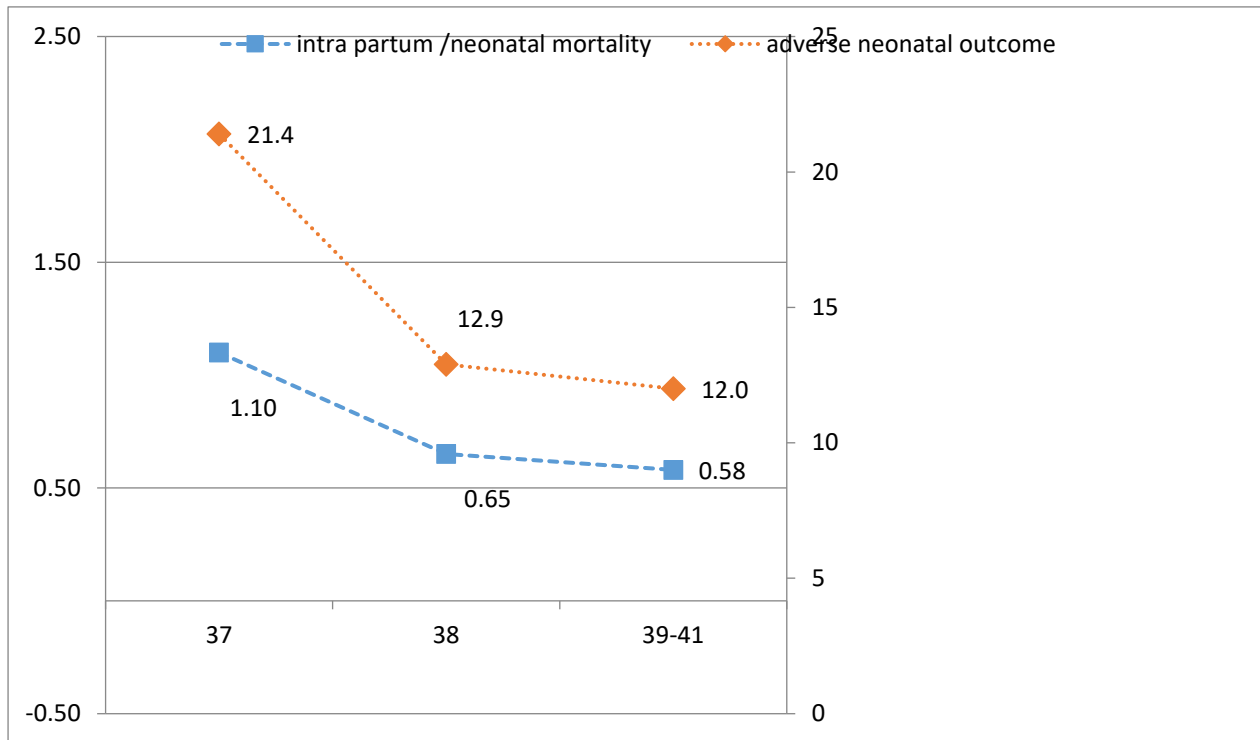

**Figure S1.** Intrapartum/neonatal mortality and adverse neonatal outcome by gestational age

Legends

Horizontal axis: Gestational age in weeks

Left Vertical axis: Intrapartum/neonatal mortality per 1000 births

Right Vertical axis: Adverse neonatal outcome per 1000 live births
