# Supplementary material for: The risk of intrapartum/neonatal mortality and morbidity following birth at 37 weeks of gestation: a nationwide cohort study
Source: PubMed Central journal article supplement — BJOG. 2019 Apr 24;126(10):1252–7. doi: 10.1111/1471-0528.15748 (PMC6767499; doi:10.1111/1471-0528.15748), 2019-04-24
Supplement: BJO-126-1252-s002.pdf [file BJO-126-1252-s002.pdf]

**Table S1.** Odds ratio's for intrapartum/neonatal mortality and adverse neonatal outcome in infants born at 37 weeks gestational age compared to infants born at 39-41 weeks (infants born with breech presentation excluded)

|                                |            | Odds ratio | 95% CI |      |
|--------------------------------|------------|------------|--------|------|
| intrapartum/neonatal mortality | Crude      | 1.90       | 1.43   | 2.52 |
|                                | Adjusted*1 | 1.88       | 1.41   | 2.50 |
|                                | Adjusted*2 | 1.87       | 1.39   | 2.51 |
| Adverse neonatal outcome       | Crude      | 1.74       | 1.63   | 1.86 |
|                                | Adjusted*1 | 1.68       | 1.57   | 1.79 |
|                                | Adjusted*2 | 1.57       | 1.47   | 1.68 |

\*1 Adjusted for parity, maternal age, ethnicity, socio-economic status, gender

\*2 Adjusted for parity, maternal age, ethnicity, socio-economic status, gender, SGA, hypertensive disorder

CI= confidence interval
