# Supplementary material for: The risk of intrapartum/neonatal mortality and morbidity following birth at 37 weeks of gestation: a nationwide cohort study
Source: PubMed Central journal article supplement — BJOG. 2019 Apr 24;126(10):1252–7. doi: 10.1111/1471-0528.15748 (PMC6767499; doi:10.1111/1471-0528.15748), 2019-04-24
Supplement: BJO-126-1252-s003.pdf [file BJO-126-1252-s003.pdf]

**Table S2.** Intrapartum/neonatal mortality and adverse neonatal outcome in infants born at 38 weeks gestational age compared to infants born at 39-41 weeks

|                                           | 38 weeks       |      | 39-41 weeks    |       |         |
|-------------------------------------------|----------------|------|----------------|-------|---------|
|                                           | n              | ‰    | n              | ‰     | p-value |
| <b>all births</b>                         | 124,788        |      | 574,781        |       |         |
| ante-partum deaths                        | 175            |      | 432            | -     |         |
| <b>alive at start of labour</b>           | <b>124,613</b> |      | <b>574,349</b> |       |         |
| Intrapartum deaths                        | 24             | 0.19 | 110            | 0.19  | 0.98    |
| <b>live births</b>                        | 124,589        |      | 574,239        |       |         |
| neonatal mortality                        | 57             | 0.46 | 226            | 0.39  | 0.31    |
| Intrapartum/neonatal mortality            | 81             | 0.65 | 336            | 0.59  | 0.39    |
| Apgar <7                                  | 1191           | 9.6  | 5763           | 10.04 | 0.12    |
| admission NICU ≥ 24 hours <sup>#</sup>    | 541            | 4.3  | 1791           | 3.12  | <0.0001 |
| adverse neonatal outcome <sup>&amp;</sup> | 1611           | 12.9 | 6912           | 12.04 | 0.009   |

<sup>#</sup> admission to 3<sup>rd</sup> level neonatal intensive care unit with ≥ 24 hours stay

<sup>&</sup> neonatal mortality, and/or Apgar <7, and/or NICU admission (therefore the figure does not add up)
