# Supplementary material for: The risk of intrapartum/neonatal mortality and morbidity following birth at 37 weeks of gestation: a nationwide cohort study
Source: PubMed Central journal article supplement — BJOG. 2019 Apr 24;126(10):1252–7. doi: 10.1111/1471-0528.15748 (PMC6767499; doi:10.1111/1471-0528.15748), 2019-04-24
Supplement: BJO-126-1252-s004.pdf [file BJO-126-1252-s004.pdf]

**Table S3.** Odds ratio's for intrapartum/neonatal mortality and adverse neonatal outcome in infants born at 38 weeks gestational age compared to infants born at 39-41 weeks

| <b>38 weeks</b>          |             | <b>Odds</b> | <b>95% CI</b> |      |
|--------------------------|-------------|-------------|---------------|------|
| mortality                | Crude       | 1.11        | 0.87          | 1.42 |
|                          | Adjusted 1* | 1.12        | 0.88          | 1.43 |
|                          | Adjusted 2* | 1.13        | 0.88          | 1.44 |
| adverse neonatal outcome | Crude       | 1.08        | 1.02          | 1.14 |
|                          | Adjusted 1* | 1.07        | 1.02          | 1.13 |
|                          | Adjusted 2* | 1.04        | 0.99          | 1.10 |

1\*Adjusted for parity, maternal age, ethnicity, socio-economic status, gender

2\*Adjusted for parity, maternal age, ethnicity, socio-economic status, gender, SGA, hypertensive disorder

CI= confidence interval
